# Supplementary material for: progressiveMauve: Multiple Genome Alignment with Gene Gain, Loss and Rearrangement
Source: PubMed Central journal article supplement (PMC2892488; doi:10.1371/journal.pone.0011147), 2010-06-25
Supplement: pone.0011147.s001.pdf [file pone.0011147.s001.pdf]

| Organism                                        | Genome size w/Plasmids | Accession    |
|-------------------------------------------------|------------------------|--------------|
| <i>E. coli</i> K-12 MG1655                      | 4,654,221              | U00096       |
| <i>E. coli</i> K-12 W3110                       | 4,646,332              | AP009048     |
| <i>E. coli</i> HS                               | 4,643,538              | AAJY00000000 |
| <i>E. coli</i> O157:H7 EDL933                   | 5,623,806              | AE005174     |
| <i>E. coli</i> O157:H7 Sakai                    | 5,594,477              | BA000007     |
| <i>E. coli</i> E24377A                          | 4,980,187              | AAJZ00000000 |
| <i>E. coli</i> CFT073 (UPEC)                    | 5,231,428              | AE014075     |
| <i>E. coli</i> UTI89 (UPEC)                     | 5,179,971              | CP000243     |
| <i>E. coli</i> APEC O1                          | 5,082,025              | CP000468     |
| <i>E. coli</i> 536 (UPEC)                       | 4,938,920              | CP000247     |
| <i>Shigella boydii</i> Sb227                    | 4,646,520              | CP000036     |
| <i>Shigella flexneri</i> 2a 2457T               | 4,988,914              | AE014073     |
| <i>Shigella flexneri</i> 2a 301                 | 4,828,821              | AE005674     |
| <i>Shigella flexneri</i> 5 8401                 | 4,574,284              | CP000266     |
| <i>Shigella dysenteriae</i> Sd197               | 4,551,958              | CP000034     |
| <i>Shigella sonnei</i> Ss046                    | 5,039,661              | CP000038     |
| <i>Salmonella enterica</i> Choleraesuis B67     | 4,944,000              | AE017220     |
| <i>Salmonella enterica</i> Typhi Ty2            | 4,791,961              | AE014613     |
| <i>Salmonella enterica</i> Typhi CT18           | 5,133,713              | AL513382     |
| <i>Salmonella enterica</i> Typhimurium LT2      | 4,951,371              | AE006468     |
| <i>Salmonella enterica</i> Paratyphi A ATCC9150 | 4,585,229              | CP000026     |
| <i>Salmonella enterica</i> Arizonae             | 4,600,800              | NC_010067    |
| <i>Salmonella enterica</i> Paratyphi B SPB7     | 4,858,887              | NC_010102    |

Table 1: Twenty-three publicly-available, finished genome sequences from the genera *Salmonella*, *Escherichia*, and *Shigella* form our target set for multiple genome alignment.
